# Supplementary material
Source: PubMed Central journal article supplement (PMC1409678)
Supplement: nar_34_5_e43__2.pdf [file nar_34_5_e43__2.pdf]

## Supplementary Material

### A. Titration of BENA435 with plasmid DNA reveals an isosbestic point at 398 nm.

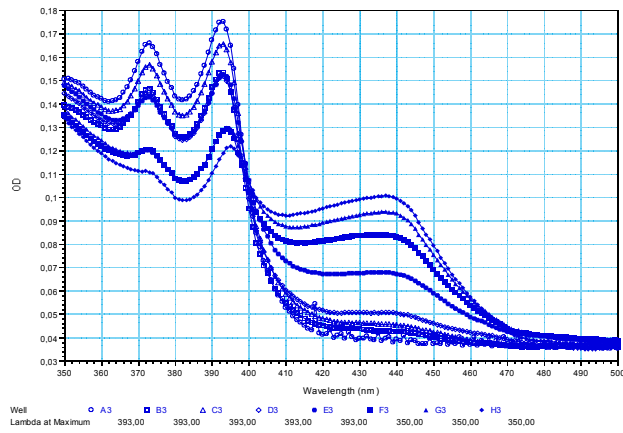

### B. Emission spectra of BENA435/DNA excited at different wavelengths

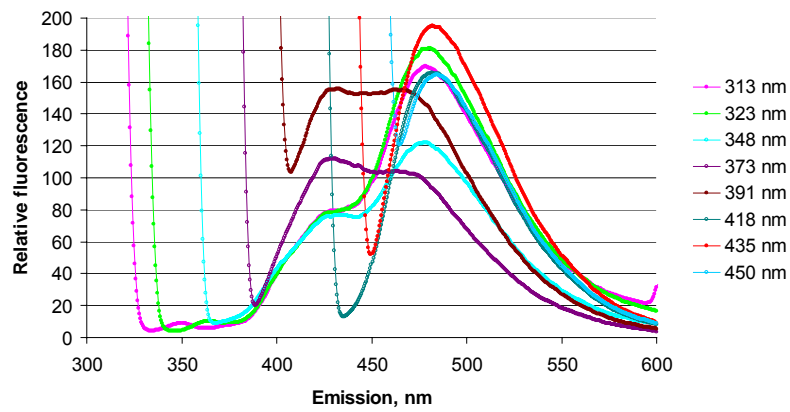

C.

**Titration of 5  $\mu$ M BENA435 with DNA and RNA  
Emission at 484 nm**

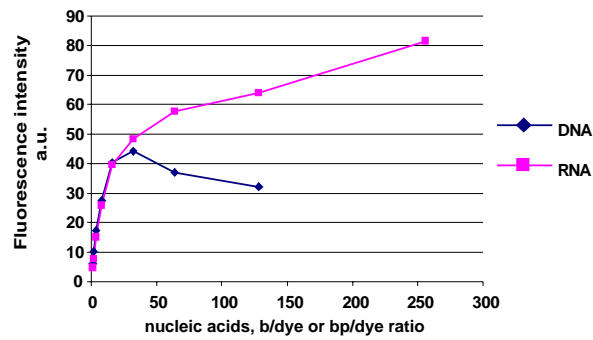

D.

**Absorption of BENA435 at 435 nm when titrated with  
dG/dC and dA/dT homopolymers**

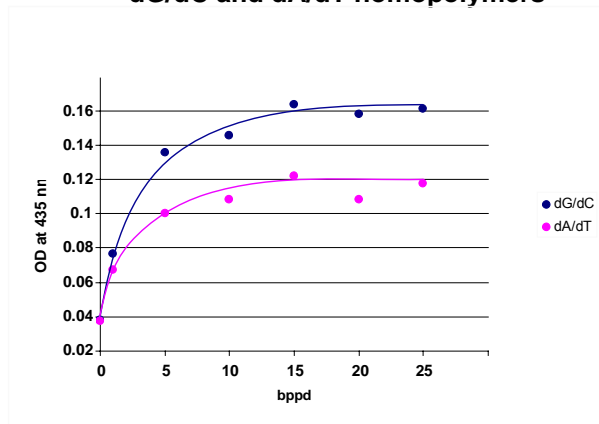

E.

**Titration of BENA435 and ethidium bromide  
with DNA or RNA**

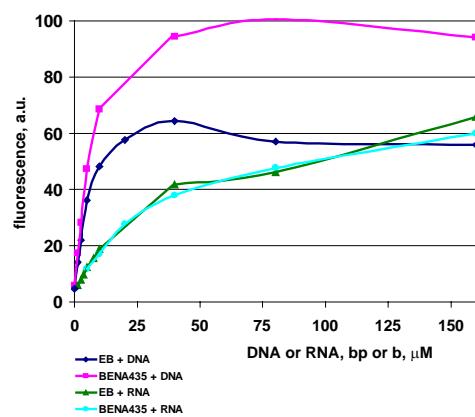

**F. Effect of salt on BENA435/DNA fluorescence**

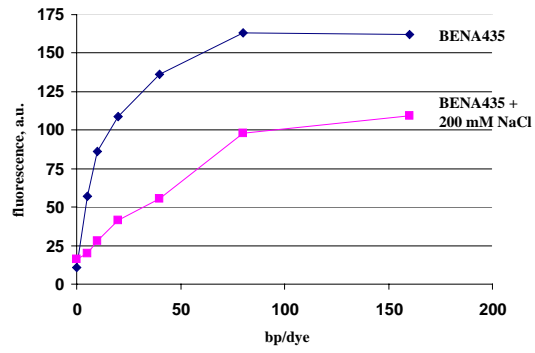

**G. Comparative fluorescence intensities at 484 nm of BENA435 and compounds 8 and 12**

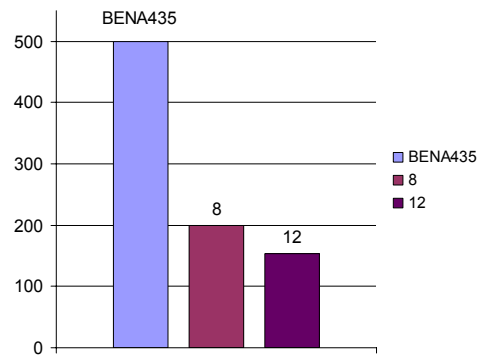

**H. BENA453 does not show photoactivation when complexed with pure plasmid DNA**

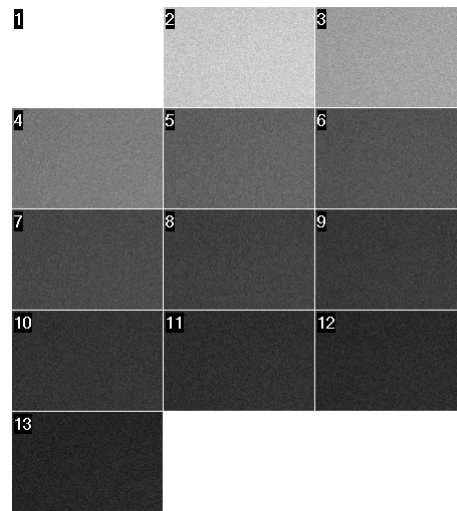

**I. Model of BENA435 intercalation between two GC base pairs.**

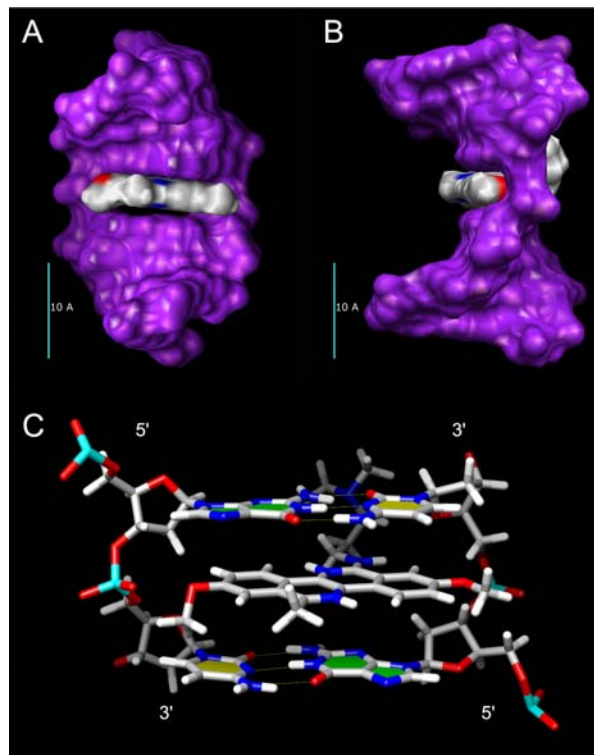

## Figures legends.

- A.** BENA435 at 25  $\mu\text{M}$  was incubated with plasmid DNA at bp/dye ratio from 0 to 3.3 and absorption spectra were taken from 350 to 500 nm. Overlay of spectra gave a single isosbestic point at 398 nm.
- B.** Emission spectra of BENA435 (mixed with excess of plasmid DNA) when illuminated at different wavelengths from 300 to 450 nm. A major peak of fluorescence was observed at wavelengths 481-484 nm. At shorter excitation wavelengths (323-391), another shoulder is visible at  $\sim 426$  nm. Numbers correspond to the excitation wavelengths.
- C.** Emission values of 5  $\mu\text{M}$  BENA435 mixed with dsDNA or tRNA at different b(p)/dye ratios. RNA is unable to saturate BENA435 even at 256 b/dye ratio.
- D.** Absorption of BENA435 at 435 nm when titrated with dG/dC or dA/dT homopolymers. Lines were drawn through the points to guide the eye and do not represent a fitting to any equation.
- E.** Ethidium bromide (EB) or BENA435 at the same concentration were titrated with increasing amounts of ds plasmid DNA or RNA. Excitation was: for BENA435 at 435, for EB at 530 nm. Emission values were measured: for BENA435 at 484 nm, for EB at 600 nm.
- F.** BENA435 at 1  $\mu\text{M}$  was titrated by plasmid DNA in the absence or presence of 200 mM NaCl.
- G.** Fluorescence of BENA435 and some of its analogues listed in the Table 1. BENA435 at 25  $\mu\text{M}$  was mixed with plasmid DNA at 250  $\mu\text{M}$  (bp/dye ratio 10). Only for BENA435 and compounds **8** and **12** the peak of fluorescence in complex with DNA is well separated from the peak of free dye.
- H.** Microscope fields showing BENA435/DNA in solution illuminated using an Alexa488/FITC filter. BENA435 at 5 $\mu\text{M}$  in 50 mM Na-phosphate buffer (pH 7.2) was mixed with DNA (320  $\mu\text{M}$ ; 64x fold molar excess of DNA over BENA435). BENA435/DNA solution contained between a glass slide and a coverslip was illuminated as described for Fig. 5B. Numbers correspond to frames. Time interval between frames is 10s.
- I.** Model of BENA435 intercalation between two GC base pairs. For docking of BENA435 into ds DNA we used the 3-D molecular coordinates of a DNA octamer 5'-D(GAAGCTTC)-3' crystallized with Actinomycin D (protein data bank PDB ID – 316D) (1). Prior to docking of BENA435, Actinomycin D was removed from the complex with DNA and hydrogens were added to both BENA435 and DNA. Model shows a conformation with a lowest energy (-4.47 kcal/mol). **A.** View from the major groove side. **B.** Side view (major groove on the left hand side). **C.** Stacking of BENA435 between two dG/dC pairs of bases.

## References:

1. Takusagawa, F., Takusagawa, K.T., Carlson, R.G. and Weaver, R.F. (1997) Selectivity of F8-actinomycin D for RNA:DNA hybrids and its anti-leukemia activity. *Bioorg Med Chem*, 5, 1197-1207.
